# Supplementary material for: Effects of participatory learning and action with women’s groups, counselling through home visits and crèches on undernutrition among children under three years in eastern India: a quasi-experimental study
Source: PubMed Central journal article supplement (PMC6637592; doi:10.1186/s12889-019-7274-3), 2019-07-18
Supplement: 12889_2019_7274_MOESM1_ESM.pdf [file 12889_2019_7274_MOESM1_ESM.pdf]

| SECTION 1: BACKGROUND INFORMATION     |                                                                                                                  |                                                                                                       |       |       |                    |
|---------------------------------------|------------------------------------------------------------------------------------------------------------------|-------------------------------------------------------------------------------------------------------|-------|-------|--------------------|
| No.                                   | Question                                                                                                         | Response                                                                                              | Code  | Go to |                    |
| 1_01                                  | District                                                                                                         | West Singhbhum                                                                                        | 1     |       |                    |
|                                       |                                                                                                                  | Mayurbhanj                                                                                            | 2     |       |                    |
|                                       |                                                                                                                  | Keonjhar                                                                                              | 3     |       |                    |
|                                       |                                                                                                                  | Ranchi                                                                                                | 4     |       |                    |
|                                       |                                                                                                                  | Ramgarh                                                                                               | 5     |       |                    |
|                                       |                                                                                                                  | Sarguja                                                                                               | 6     |       |                    |
|                                       |                                                                                                                  | Motihari                                                                                              | 7     |       |                    |
| 1_02                                  | Cluster code                                                                                                     |                                                                                                       |       |       |                    |
| 1_03                                  | Name of Mother                                                                                                   | _____                                                                                                 |       |       |                    |
| 1_04                                  | Name of father                                                                                                   | _____                                                                                                 |       |       |                    |
| 1_05                                  | Date of interview                                                                                                | ____/____/____<br>(day) (month) (year)                                                                |       |       |                    |
| 1_06                                  | How many living children less than 3 years old, including newborns, do you have? <i>Number of children</i> ----- | -----                                                                                                 |       |       |                    |
| 1_07                                  | Names of all children below the age of 3 years (oldest child first)                                              |                                                                                                       | Names | Sex   | (day) month)(year) |
|                                       |                                                                                                                  | 1                                                                                                     |       |       | / /                |
|                                       |                                                                                                                  | 2                                                                                                     |       |       | / /                |
|                                       |                                                                                                                  | 3                                                                                                     |       |       | / /                |
|                                       |                                                                                                                  | 4                                                                                                     |       |       | / /                |
| 1_08                                  | What is the birth interval between this child and the last living child                                          | ..... in months<br>..... in years<br><br>If the mother has only one child/ or this is the first child | -8    |       |                    |
| 1_09                                  | Did you attend any PLA meetings about children's health issues? (Only for PLA and crèche)                        | Yes                                                                                                   | 1     | 2_01  |                    |
|                                       |                                                                                                                  | No                                                                                                    | 2     |       |                    |
| 1_10                                  | How many of these meetings did you attend?                                                                       | _____                                                                                                 |       |       |                    |
| 1_11                                  | What kind of benefit did you get? (circle all mentioned by mother – do not prompt)<br><br>[ Multiple response]   | 1. Information                                                                                        | 1     |       |                    |
|                                       |                                                                                                                  | 2. Support from other women                                                                           | 2     |       |                    |
|                                       |                                                                                                                  | 3. Support from facilitator                                                                           | 3     |       |                    |
|                                       |                                                                                                                  | 4. monetary support                                                                                   | 4     |       |                    |
|                                       |                                                                                                                  | 5. Other-----                                                                                         | 5     |       |                    |
|                                       |                                                                                                                  | 6. Other-----                                                                                         | 6     |       |                    |
|                                       |                                                                                                                  | 7. Other-----                                                                                         | 7     |       |                    |
|                                       |                                                                                                                  | 8. Other-----                                                                                         | 8     |       |                    |
| SECTION 2: SOCIO-ECONOMIC INFORMATION |                                                                                                                  |                                                                                                       |       |       |                    |
| 2_01                                  | Do you belong to any of the following?                                                                           | Scheduled Tribe (ST)                                                                                  | 1     | 2_02  |                    |
|                                       |                                                                                                                  | Scheduled Caste (SC)                                                                                  | 2     | 2_03  |                    |
|                                       |                                                                                                                  | Other Backward Caste (OBC)                                                                            | 3     | 2_04  |                    |
|                                       |                                                                                                                  | None of the above                                                                                     | 4     | 2_04  |                    |
| 2_02                                  | Which tribe do you belong to? (name of the tribe)                                                                | Please specify.....                                                                                   |       |       |                    |
| 2_03                                  | Which caste do you belong to? (name of the caste)                                                                | Please specify.....                                                                                   |       |       |                    |
| 2_04                                  | Highest years of schooling completed by you?                                                                     | Class.....                                                                                            |       | 2_06  |                    |
|                                       |                                                                                                                  | No schooling                                                                                          | -8    |       |                    |
| 2_05                                  | Can you read this passage for me please? (Interviewer to decide the ability level)                               | Easily                                                                                                | 1     |       |                    |
|                                       |                                                                                                                  | With difficulty                                                                                       | 2     |       |                    |
|                                       |                                                                                                                  | Cannot read                                                                                           | 3     |       |                    |

| SECTION 1: BACKGROUND INFORMATION |                                                                                                                           |                             |      |      |       |
|-----------------------------------|---------------------------------------------------------------------------------------------------------------------------|-----------------------------|------|------|-------|
| No.                               | Question                                                                                                                  | Response                    | Code |      | Go to |
|                                   |                                                                                                                           |                             | Y    | N    |       |
| 2_06                              | Which of these do you presently have in your household?<br><br>[ Ask for each item]                                       | 1.Mattress                  | 1    | 2    |       |
|                                   |                                                                                                                           | 2.Cot / bed                 | 1    | 2    |       |
|                                   |                                                                                                                           | 3.A chair                   | 1    | 2    |       |
|                                   |                                                                                                                           | 4.A table                   | 1    | 2    |       |
|                                   |                                                                                                                           | 5.A pressure cooker         | 1    | 2    |       |
|                                   |                                                                                                                           | 6.Electricity               | 1    | 2    |       |
|                                   |                                                                                                                           | 7.A Fan                     | 1    | 2    |       |
|                                   |                                                                                                                           | 8.Radio / Transistor / Tape | 1    | 2    |       |
|                                   |                                                                                                                           | 9.TV                        | 1    | 2    |       |
|                                   |                                                                                                                           | 10.Watch / Clock            | 1    | 2    |       |
|                                   |                                                                                                                           | 11.Telephone / mobile phone | 1    | 2    |       |
|                                   |                                                                                                                           | 12.Animal-drawn cart        | 1    | 2    |       |
|                                   |                                                                                                                           | 13.Bicycle                  | 1    | 2    |       |
|                                   |                                                                                                                           | 14.Motorcycle               | 1    | 2    |       |
| 2_07                              | Do you have any agricultural land?                                                                                        | Yes                         | 1    |      |       |
|                                   |                                                                                                                           | No                          | 2    |      |       |
| 2_08                              | Do you own a NAREGA card                                                                                                  | Yes                         | 1    |      |       |
|                                   |                                                                                                                           | No                          | 2    | 2_11 |       |
| 2_09                              | Have you or any of your family members ever worked under NREGA?                                                           | Yes                         | 1    |      |       |
|                                   |                                                                                                                           | No                          | 2    | 2_11 |       |
| 2_10                              | For how many days did you/your family members work under NREGA in the last one year                                       | ..... in days               |      |      |       |
| 2_11                              | What kind of a ration card do you have?                                                                                   | APL                         | 1    |      |       |
|                                   |                                                                                                                           | BPL                         | 2    |      |       |
|                                   |                                                                                                                           | AAY                         | 3    |      |       |
|                                   |                                                                                                                           | No Ration Card              | 4    |      |       |
| 2_12                              | Did you get rations (rice/wheat) from the ration shop in the last three months (ask for the last three completed months)? | Yes, every month            | 1    |      |       |
|                                   |                                                                                                                           | Yes, only once              | 2    |      |       |
|                                   |                                                                                                                           | Yes, twice                  | 3    |      |       |
|                                   |                                                                                                                           | No, not at all              | 4    |      |       |

| SECTION 3 : HEALTH RELATED - Questions related to DIARRHOEA |                                                                                                                             |                                             |   |      |  |
|-------------------------------------------------------------|-----------------------------------------------------------------------------------------------------------------------------|---------------------------------------------|---|------|--|
| 3_01                                                        | What is the <b>main</b> source of drinking water for members of your household? (for <b>most</b> of the months of the year) | Hand pump/Tube well                         | 1 |      |  |
|                                                             |                                                                                                                             | Dug well (covered)                          | 2 |      |  |
|                                                             |                                                                                                                             | Dug well (not covered)                      | 3 |      |  |
|                                                             |                                                                                                                             | River/Canal/Stream /Spring                  | 4 |      |  |
|                                                             |                                                                                                                             | Chuan/ Surface water/ Pond                  | 5 |      |  |
|                                                             |                                                                                                                             | Others.....                                 | 6 |      |  |
| 3_02                                                        | Which water treatment method do you <b>mostly</b> use before drinking water                                                 | No water treatment                          | 1 |      |  |
|                                                             |                                                                                                                             | Boiling                                     | 2 |      |  |
|                                                             |                                                                                                                             | Chlorine treatment                          | 3 |      |  |
|                                                             |                                                                                                                             | Filter with cloth                           | 4 |      |  |
|                                                             |                                                                                                                             | Others                                      | 5 |      |  |
| 3_03                                                        | Is soap used in your house                                                                                                  | Yes                                         | 1 |      |  |
|                                                             |                                                                                                                             | No                                          | 2 | 3_05 |  |
| 3_04                                                        | What are the instances in which you use soap to wash your hands?<br><br>[ Ask for each option]<br>[Multiple response]       | 1. After use of toilet                      | 1 | 2    |  |
|                                                             |                                                                                                                             | 2.Before eating                             | 1 | 2    |  |
|                                                             |                                                                                                                             | 3.After attending a child who has defecated | 1 | 2    |  |
|                                                             |                                                                                                                             | 4.Before preparing food                     | 1 | 2    |  |

|                                            |                                                                                                                                |                                               |    |   |  |
|--------------------------------------------|--------------------------------------------------------------------------------------------------------------------------------|-----------------------------------------------|----|---|--|
|                                            |                                                                                                                                | 5.Before feeding child                        | 1  | 2 |  |
|                                            |                                                                                                                                | 6.After handling cow dung/dirt                | 1  | 2 |  |
| 3_05                                       | How do you handle or dispose of children's faeces <b>most</b> of the times?                                                    | Children always use the latrine               | 1  |   |  |
|                                            |                                                                                                                                | Children's faeces are thrown outside          | 2  |   |  |
|                                            |                                                                                                                                | Children's faeces are thrown into the latrine | 3  |   |  |
|                                            |                                                                                                                                | Children's faeces are rinsed away             | 4  |   |  |
|                                            |                                                                                                                                | Buried /Covered with mud/Ash                  | 5  |   |  |
|                                            |                                                                                                                                | Other_____                                    | 6  |   |  |
| 3_06                                       | Do you wash vegetables and fruits before consumption?                                                                          | Always                                        | 1  |   |  |
|                                            |                                                                                                                                | Most of the time                              | 2  |   |  |
|                                            |                                                                                                                                | Rarely                                        | 3  |   |  |
|                                            |                                                                                                                                | Never                                         | 4  |   |  |
| 3_07                                       | How do you wash utensils before feeding?                                                                                       | Use soap                                      | 1  |   |  |
|                                            |                                                                                                                                | Not used soap                                 | 2  |   |  |
| 3_08                                       | Have you ever fed your baby with cup/bowl and a spoon                                                                          | Yes                                           | 1  |   |  |
|                                            |                                                                                                                                | No                                            | 2  |   |  |
| <b>SECTION RELATED TO ARI determinants</b> |                                                                                                                                |                                               |    |   |  |
| 3_09                                       | In this household, which of the following do you use <b>most</b> of the times to cook food?                                    | Stove                                         | 1  |   |  |
|                                            |                                                                                                                                | Chullah                                       | 2  |   |  |
|                                            |                                                                                                                                | Open Fire                                     | 3  |   |  |
|                                            |                                                                                                                                | Other_____                                    | 4  |   |  |
| 3_10                                       | Does one of your household members (people with whom you live under the same roof) <b>smoke</b> cigarettes/bidi/other tobacco? | Yes                                           | 1  |   |  |
|                                            |                                                                                                                                | No                                            | 2  |   |  |
|                                            |                                                                                                                                | Don't know                                    | -9 |   |  |
| 3_11                                       | Where do you <b>mostly</b> cook food?<br><br><i>Ask and observe at the same time</i>                                           | In the same room where you sleep in           | 1  |   |  |
|                                            |                                                                                                                                | In a separate room/kitchen                    | 2  |   |  |
|                                            |                                                                                                                                | Outdoors                                      | 3  |   |  |

#### SECTION 4 : FOOD SECURITY

| No.  | Question                                                                                                                                                     | Response                                                                         | Code     | Go to    |
|------|--------------------------------------------------------------------------------------------------------------------------------------------------------------|----------------------------------------------------------------------------------|----------|----------|
| 4_01 | What is your family's <b>main</b> staple food?                                                                                                               | Rice                                                                             | 1        |          |
|      |                                                                                                                                                              | Wheat                                                                            | 2        |          |
|      |                                                                                                                                                              | Ragi                                                                             | 3        |          |
|      |                                                                                                                                                              | Other, specify.....                                                              | 4        |          |
| 4_02 | What is the main way that you obtain your family's staple food <b>most</b> of the time?                                                                      | Own production                                                                   | 1        |          |
|      |                                                                                                                                                              | Purchased from regular shop                                                      | 2        |          |
|      |                                                                                                                                                              | Purchased from ration                                                            | 3        |          |
|      |                                                                                                                                                              | Barter, borrow, exchange for labour, gift                                        | 4        |          |
|      |                                                                                                                                                              | Other, specify.....                                                              | 6        |          |
|      |                                                                                                                                                              |                                                                                  | <b>Y</b> | <b>N</b> |
| 4_03 | Has your household experienced any of the following during the <b>last 12 months</b> ?<br><br><i>[ Ask for each option ]</i><br><i>[ Multiple response ]</i> | 1. A major health problem in your household (if different from disease epidemic) | 1        | 2        |
|      |                                                                                                                                                              | 2. Marriage of a family member                                                   | 1        | 2        |
|      |                                                                                                                                                              | 3. Damage to houses or crops by elephants                                        | 1        | 2        |
|      |                                                                                                                                                              | 4. Death of a close one                                                          | 1        | 2        |
|      |                                                                                                                                                              | 5. Did not experience any such problem in last 12 months                         | 1        | 2        |

#### SECTION 5 A: CHILD HEALTH

| No. | Question | Response | Code | Go to |
|-----|----------|----------|------|-------|
|-----|----------|----------|------|-------|

|      |                                                                                                                                                                                                                                                                                                                               |                                                                          |          |          |           |
|------|-------------------------------------------------------------------------------------------------------------------------------------------------------------------------------------------------------------------------------------------------------------------------------------------------------------------------------|--------------------------------------------------------------------------|----------|----------|-----------|
| 5_01 | Name of the child                                                                                                                                                                                                                                                                                                             | _____                                                                    |          |          |           |
| 5_02 | Do you have a vaccination/ immunization/ health card? May I see it?                                                                                                                                                                                                                                                           | Yes                                                                      | 1        |          |           |
|      |                                                                                                                                                                                                                                                                                                                               | No                                                                       | 2        |          |           |
| 5_03 | Date of birth of the child<br>(confirm the date of birth from vaccination/ immunization/ health card)                                                                                                                                                                                                                         | From card: ___/___/___                                                   |          |          |           |
|      |                                                                                                                                                                                                                                                                                                                               | From recall: ___/___/___                                                 |          |          |           |
|      |                                                                                                                                                                                                                                                                                                                               | Do not know                                                              | -9       |          |           |
| 5_04 | Has your baby ever been breastfed?                                                                                                                                                                                                                                                                                            | Yes                                                                      | 1        |          |           |
|      |                                                                                                                                                                                                                                                                                                                               | No                                                                       | 2        | 5_12     |           |
| 5_05 | Was anything given to the baby (to drink, lick) immediate after birth?<br><i>Probe (pre lacteal feeding)</i>                                                                                                                                                                                                                  | Yes                                                                      | 1        |          |           |
|      |                                                                                                                                                                                                                                                                                                                               | No                                                                       | 2        |          |           |
|      |                                                                                                                                                                                                                                                                                                                               | Don't know                                                               | -9       |          |           |
| 5_06 | Was colostrum given to the baby (name) immediate after birth?                                                                                                                                                                                                                                                                 | Yes                                                                      | 1        |          |           |
|      |                                                                                                                                                                                                                                                                                                                               | No                                                                       | 2        |          |           |
|      |                                                                                                                                                                                                                                                                                                                               | Don't know                                                               | -9       |          |           |
| 5_07 | When was the baby put to the breast after birth?                                                                                                                                                                                                                                                                              | Within 1 hour                                                            | 1        |          |           |
|      |                                                                                                                                                                                                                                                                                                                               | After 1 hour                                                             | 2        |          |           |
|      |                                                                                                                                                                                                                                                                                                                               | Within 3 days                                                            | 3        |          |           |
|      |                                                                                                                                                                                                                                                                                                                               | After 3 days                                                             | 4        |          |           |
|      |                                                                                                                                                                                                                                                                                                                               | Not breastfed                                                            | 5        |          |           |
|      |                                                                                                                                                                                                                                                                                                                               | Don't know                                                               | -9       |          |           |
| 5_08 | How old was <b>(name)</b> the first time you gave him/her something other than breast milk?<br><i>(Exclusive Breastfeeding)</i>                                                                                                                                                                                               | _____ months<br><br><i>(if less than 1 months old, please mention 0)</i> |          |          |           |
| 5_09 | Is (child's name) still being breastfed?                                                                                                                                                                                                                                                                                      | Yes                                                                      | 1        |          |           |
|      |                                                                                                                                                                                                                                                                                                                               | No                                                                       | 2        | 5_12     |           |
| 5_10 | Was your child breastfed in the last 24 hours?                                                                                                                                                                                                                                                                                | Yes                                                                      | 1        |          |           |
|      |                                                                                                                                                                                                                                                                                                                               | No                                                                       | 2        | 5_12     |           |
| 5_11 | How many times was your child breastfed in last 24 hours ?                                                                                                                                                                                                                                                                    | _____ times                                                              |          |          |           |
| 5_12 | <b>Aside from breast milk</b> , did <b>(name)</b> have cow/goat milk since this time yesterday?                                                                                                                                                                                                                               | Yes                                                                      | 1        |          |           |
|      |                                                                                                                                                                                                                                                                                                                               | No                                                                       | 2        | 5_14     |           |
| 5_13 | How many times did your child receive cow/goat milk ( <b>NOT breast milk</b> ) in the last 24 hours?                                                                                                                                                                                                                          | ..... times                                                              |          |          |           |
| 5_14 | <b>Aside from breast milk</b> , did <b>(name)</b> have infant formula/powdered milk since this time yesterday?                                                                                                                                                                                                                | Yes                                                                      |          |          |           |
|      |                                                                                                                                                                                                                                                                                                                               | No                                                                       |          | 5_16     |           |
| 5_15 | How many times did your child receive infant formula/powdered milk ( <b>NOT breast milk</b> ) in the last 24 hours?                                                                                                                                                                                                           | ..... times                                                              |          |          |           |
| 5_16 | Has [name] ever been fed anything with a bottle?                                                                                                                                                                                                                                                                              | Yes                                                                      | 1        |          |           |
|      |                                                                                                                                                                                                                                                                                                                               | No                                                                       | 2        | 5_18     |           |
| 5_17 | Was he/she bottle-fed yesterday                                                                                                                                                                                                                                                                                               | Yes                                                                      | 1        |          |           |
|      |                                                                                                                                                                                                                                                                                                                               | No                                                                       | 2        |          |           |
|      |                                                                                                                                                                                                                                                                                                                               |                                                                          | <b>Y</b> | <b>N</b> | <b>DK</b> |
| 5_18 | Now I would like to ask you about other liquids that (name) may have had <b>since this time yesterday</b> during the day or at night. I am interested in whether your child had the item even if it was combined with other food or drink.<br><br>(Did (name) drink/eat any of the following?)<br><i>[ Multiple response]</i> | 1. Vitamin or mineral syrups                                             | 1        | 2        | -9        |
|      |                                                                                                                                                                                                                                                                                                                               | 2. Iron syrup                                                            | 1        | 2        | -9        |
|      |                                                                                                                                                                                                                                                                                                                               | 3. ORS                                                                   | 1        | 2        | -9        |
|      |                                                                                                                                                                                                                                                                                                                               | 4. Plain water                                                           | 1        | 2        | -9        |
|      |                                                                                                                                                                                                                                                                                                                               | 5. Infant formula                                                        | 1        | 2        | -9        |
|      |                                                                                                                                                                                                                                                                                                                               | 6. Milk such as tinned /powdered/ fresh animal milk                      | 1        | 2        | -9        |

|      |                                                                                                                                                                                                                                      |                                                                                                    |          |          |              |  |
|------|--------------------------------------------------------------------------------------------------------------------------------------------------------------------------------------------------------------------------------------|----------------------------------------------------------------------------------------------------|----------|----------|--------------|--|
|      | [Ask for each option]                                                                                                                                                                                                                | 7. Clear broth ( <i>maad pani</i> )                                                                | 1        | 2        | -9           |  |
|      |                                                                                                                                                                                                                                      | 8. Yogurt ( <i>dahi</i> )                                                                          | 1        | 2        | -9           |  |
|      |                                                                                                                                                                                                                                      | 9.Thin porridge( <i>daliya</i> )                                                                   | 1        | 2        | -9           |  |
|      |                                                                                                                                                                                                                                      | 10.Any other liquid (specify)____                                                                  | 1        | 2        | -9           |  |
|      |                                                                                                                                                                                                                                      |                                                                                                    |          |          |              |  |
| 5_19 | Other than the liquids mentioned above, does ____ (NAME) normally eat/consume any solid/semi-solid food?                                                                                                                             | Yes<br>No<br>Dont Know                                                                             |          |          | 1<br>2<br>-9 |  |
| 5_20 | How old was ____ (NAME) when he/she was first fed any solid/semi-solid food                                                                                                                                                          | _____ months<br>Not yet fed                                                                        |          |          | -9           |  |
|      |                                                                                                                                                                                                                                      |                                                                                                    | <b>Y</b> | <b>N</b> | <b>DK</b>    |  |
| 5_21 | So, since this time yesterday, did <b>(name)</b> drink/eat at least 10g of the following:<br><br><b>WILL NEED TO SHOW GM WHAT 10G LOOKS/FEELS LIKE OF DIFFERENT COMMON FOODS</b><br><br>[Multiple response]<br>[Ask for each option] | 1. Bread, Rice, Wheat or other foods made from grains, including thick grain-based porridge?       | 1        | 2        | -9           |  |
|      |                                                                                                                                                                                                                                      | 2. Pumpkin, carrots, or sweet potatoes that are yellow or orange inside?                           | 1        | 2        | -9           |  |
|      |                                                                                                                                                                                                                                      | 3. White potatoes, white yams or any other foods made from roots?                                  | 1        | 2        | -9           |  |
|      |                                                                                                                                                                                                                                      | 4. Any dark green leafy vegetables?                                                                | 1        | 2        | -9           |  |
|      |                                                                                                                                                                                                                                      | 5. RIPE mangoes, RIPE papayas or ( <i>insert other local vitamin A-rich fruits</i> )?              | 1        | 2        | -9           |  |
|      |                                                                                                                                                                                                                                      | 6. Any other fruits or vegetables? (Including UNRIPE mangoes and papayas and locally grown fruits) | 1        | 2        | -9           |  |
|      |                                                                                                                                                                                                                                      | 7. Liver, kidney, heart or other organ meats?                                                      | 1        | 2        | -9           |  |
|      |                                                                                                                                                                                                                                      | 8. Any meat, such as beef, pork, lamb, goat, chicken, or duck?                                     | 1        | 2        | -9           |  |
|      |                                                                                                                                                                                                                                      | 9. Eggs?                                                                                           | 1        | 2        | -9           |  |
|      |                                                                                                                                                                                                                                      | 10. Fresh or dried fish, shellfish, or seafood?                                                    | 1        | 2        | -9           |  |
|      |                                                                                                                                                                                                                                      | 11. Any foods made from beans, peas, lentils, or nuts?                                             | 1        | 2        | -9           |  |
|      |                                                                                                                                                                                                                                      | 12. Cheese, yogurt, or other milk products?                                                        | 1        | 2        | -9           |  |
|      |                                                                                                                                                                                                                                      | 13. Any oil, fats, Ghee, butter or foods made with any of these?                                   | 1        | 2        | -9           |  |
|      |                                                                                                                                                                                                                                      | 14. Any sugary foods such as sweets, candies, cakes or biscuits?                                   | 1        | 2        | -9           |  |
|      |                                                                                                                                                                                                                                      | 15. Condiments for flavour, such as chillies, spices, herbs or fish powder?                        | 1        | 2        | -9           |  |
|      |                                                                                                                                                                                                                                      | 16. Grubs, snails or insects?                                                                      | 1        | 2        | -9           |  |
|      |                                                                                                                                                                                                                                      | 17. Foods made with red palm oil, red palm nut, red palm nut pulp sauce?                           | 1        | 2        | -9           |  |

|      |                                                                                                                          |                     |   |   |    |  |
|------|--------------------------------------------------------------------------------------------------------------------------|---------------------|---|---|----|--|
|      |                                                                                                                          | 18. Any other food? | 1 | 2 | -9 |  |
| 5_22 | How many times did your child receive semi solid, mushy, or solid feeds ( <b>NOT breast milk</b> ) in the last 24 hours? | _____ times         |   |   |    |  |

| SECTION 5B: [NAME'S] VACCINATIONS & HEALTH                                                                     |                                                                                               |                             |                    |    |    |      |
|----------------------------------------------------------------------------------------------------------------|-----------------------------------------------------------------------------------------------|-----------------------------|--------------------|----|----|------|
| No.                                                                                                            | Question                                                                                      |                             |                    |    |    |      |
| <b>Look at all the records available for the child and speak to the mother to try to fill in the following</b> |                                                                                               |                             |                    |    |    |      |
|                                                                                                                |                                                                                               | YES<br>from card            | YES<br>from recall | NO | DK |      |
| 5_23                                                                                                           | Measles ( <i>specify between 9 months to 1 year</i> )                                         | 1                           | 2                  | 0  | -9 |      |
| 5_24                                                                                                           | Other specify ( <i>Hepatitis or others</i> )                                                  | 1                           | 2                  | 0  | -9 |      |
| 5_25                                                                                                           | Has (name) taken any drug to get rid of intestinal worms in the past 6 months?                | 1                           | 2                  | 0  | -9 |      |
| 5_26                                                                                                           | Has [name] received vitamin A solution in the past 6 months?                                  | 1                           | 2                  | 0  | -9 |      |
| <b>Knowledge section</b>                                                                                       |                                                                                               |                             |                    |    |    |      |
| 5_27                                                                                                           | How much drink should be given to a child during diarrhoea?                                   | Less than usual             |                    |    | 1  |      |
|                                                                                                                |                                                                                               | Same as usual               |                    |    | 2  |      |
|                                                                                                                |                                                                                               | More than usual             |                    |    | 3  |      |
|                                                                                                                |                                                                                               | Not given anything to drink |                    |    | -8 |      |
| 5_28                                                                                                           | How much a child should be given to eat during diarrhoea?                                     | Less than usual             |                    |    | 1  |      |
|                                                                                                                |                                                                                               | Same as usual               |                    |    | 2  |      |
|                                                                                                                |                                                                                               | More than usual             |                    |    | 3  |      |
|                                                                                                                |                                                                                               | Not given anything to eat   |                    |    | -8 |      |
| 5_29                                                                                                           | How much breastfeed should be given <b>to a child</b> during diarrhoea?                       | Less than usual             |                    |    | 1  |      |
|                                                                                                                |                                                                                               | Same as usual               |                    |    | 2  |      |
|                                                                                                                |                                                                                               | More than usual             |                    |    | 3  |      |
|                                                                                                                |                                                                                               | Not breastfed at all        |                    |    | -8 |      |
| 5_30                                                                                                           | How much drink should be given to a child during fever and cough?                             | Less than usual             |                    |    | 1  |      |
|                                                                                                                |                                                                                               | Same as usual               |                    |    | 2  |      |
|                                                                                                                |                                                                                               | More than usual             |                    |    | 3  |      |
|                                                                                                                |                                                                                               | Not given anything to drink |                    |    | -8 |      |
| 5_31                                                                                                           | How much a child should be given to eat during fever and cough?                               | Less than usual             |                    |    | 1  |      |
|                                                                                                                |                                                                                               | Same as usual               |                    |    | 2  |      |
|                                                                                                                |                                                                                               | More than usual             |                    |    | 3  |      |
|                                                                                                                |                                                                                               | Not given anything to eat   |                    |    | -8 |      |
| 5_32                                                                                                           | How much breastfeed should be given <b>to a child</b> during fever and cough?                 | Less than usual             |                    |    | 1  |      |
|                                                                                                                |                                                                                               | Same as usual               |                    |    | 2  |      |
|                                                                                                                |                                                                                               | More than usual             |                    |    | 3  |      |
|                                                                                                                |                                                                                               | Not breastfed at all        |                    |    | -8 |      |
| 5_33                                                                                                           | Has (name) had diarrhoea ( <b>loose stools more than 3 times a day</b> ) in the last 2 weeks? | Yes                         |                    |    | 1  |      |
|                                                                                                                |                                                                                               | No                          |                    |    | 2  | 5_40 |
| 5_34                                                                                                           | How much (name) was given <b>to drink</b> during the diarrhoea?                               | Less than usual             |                    |    | 1  |      |
|                                                                                                                |                                                                                               | Same as usual               |                    |    | 2  |      |
|                                                                                                                |                                                                                               | More than usual             |                    |    | 3  |      |
|                                                                                                                |                                                                                               | Not given anything to drink |                    |    | -8 |      |
| 5_35                                                                                                           | How much (name) was given <b>to eat</b> during the diarrhoea?                                 | Less than usual             |                    |    | 1  |      |
|                                                                                                                |                                                                                               | Same as usual               |                    |    | 2  |      |
|                                                                                                                |                                                                                               | More than usual             |                    |    | 3  |      |
|                                                                                                                |                                                                                               | Not given anything to eat   |                    |    | -8 |      |
| 5_36                                                                                                           | How much breastfeed was given <b>to (name)</b> during the diarrhoea?                          | Less than usual             |                    |    | 1  |      |
|                                                                                                                |                                                                                               | Same as usual               |                    |    | 2  |      |

|      |                                                                                                                                   |                                                  |          |           |
|------|-----------------------------------------------------------------------------------------------------------------------------------|--------------------------------------------------|----------|-----------|
|      |                                                                                                                                   | More than usual                                  | 3        |           |
|      |                                                                                                                                   | Not breastfed at all                             | -8       |           |
| 5_37 | Did you <b>seek advice</b> about the diarrhoea from any source?                                                                   | Yes                                              | 1        |           |
|      |                                                                                                                                   | No                                               | 2        | 5_39      |
| 5_38 | From whom did you first seek <b>advice</b> about the diarrhoea?                                                                   | AWW                                              | 1        |           |
|      |                                                                                                                                   | ASHA                                             | 2        |           |
|      |                                                                                                                                   | ANM                                              | 3        |           |
|      |                                                                                                                                   | Women's group member                             | 4        |           |
|      |                                                                                                                                   | Creche worker                                    | 5        |           |
|      |                                                                                                                                   | Other _____                                      | 6        |           |
| 5_39 | Was he/she given any of the following at any time since he/she started having the diarrhoea                                       | A fluid made from a special packet called ORS?   | 1        | 2         |
|      |                                                                                                                                   | Gruel made from rice [other local grain]?        | 1        | 2         |
|      |                                                                                                                                   | Homemade ORS ( <i>namak cheeni ka ghol</i> )     | 1        | 2         |
|      |                                                                                                                                   | Nothing was given                                | 1        | 2         |
|      |                                                                                                                                   | Other _____                                      | 1        | 2         |
| 5_40 | Has (name) been ill with a fever and cough at any time <b>in the last 2 weeks?</b>                                                | Yes                                              | 1        |           |
|      |                                                                                                                                   | No                                               | 2        | 5_46      |
| 5_41 | How much (name) was given <b>to drink</b> during the fever and cough?                                                             | Less than usual                                  | 1        |           |
|      |                                                                                                                                   | Same as usual                                    | 2        |           |
|      |                                                                                                                                   | More than usual                                  | 3        |           |
|      |                                                                                                                                   | Not given anything to drink                      | -8       |           |
| 5_42 | How much (name) was given <b>to eat</b> during the fever and cough?                                                               | Less than usual                                  | 1        |           |
|      |                                                                                                                                   | Same as usual                                    | 2        |           |
|      |                                                                                                                                   | More than usual                                  | 3        |           |
|      |                                                                                                                                   | Not given anything to eat                        | -8       |           |
| 5_43 | How much breastfeed was given <b>to (name)</b> during the fever and cough?                                                        | Less than usual                                  | 1        |           |
|      |                                                                                                                                   | Same as usual                                    | 2        |           |
|      |                                                                                                                                   | More than usual                                  | 3        |           |
|      |                                                                                                                                   | Not breastfed at all                             | -8       |           |
| 5_44 | Did you seek <b>advice</b> about the fever and cough from any source?                                                             | Yes                                              | 1        |           |
|      |                                                                                                                                   | No                                               | 2        | 5_46      |
| 5_45 | From whom did you first seek <b>advice</b> about the fever and cough?                                                             | AWW                                              | 1        |           |
|      |                                                                                                                                   | ASHA                                             | 2        |           |
|      |                                                                                                                                   | ANM                                              | 3        |           |
|      |                                                                                                                                   | Women's group member                             | 4        |           |
|      |                                                                                                                                   | Creche worker                                    | 5        |           |
|      |                                                                                                                                   | Other specify.....                               | 6        |           |
|      |                                                                                                                                   |                                                  | <b>Y</b> | <b>N</b>  |
|      |                                                                                                                                   |                                                  |          | <b>DK</b> |
| 5_46 | Have you used any of these services of the Anganwadi Center in last 3 months?<br><br>[Multiple response]<br>[Ask for each option] | 1. Take-home rations for women and infants       | 1        | 2         |
|      |                                                                                                                                   | 2. Immunization                                  | 1        | 2         |
|      |                                                                                                                                   | 3. Health check up for children                  | 1        | 2         |
|      |                                                                                                                                   | 4. Growth monitoring of children (child weighed) | 1        | 2         |
|      |                                                                                                                                   | 5. Health referral services                      | 1        | 2         |
|      |                                                                                                                                   | 6. Health and nutrition counselling for parents  | 1        | 2         |
|      |                                                                                                                                   | 7. Home visits by Anganwadi worker               | 1        | 2         |
| 5_47 | <b>If child is 6 months or older:</b><br>In the <b>last 3 months</b> how often has (NAME) received                                | Regular                                          | 1        |           |
|      |                                                                                                                                   | Irregular                                        | 2        |           |

|  |                                 |                |   |  |
|--|---------------------------------|----------------|---|--|
|  | food from the Anganwadi worker? | Never received | 3 |  |
|--|---------------------------------|----------------|---|--|

|      |                                                                                          |                           |    |  |
|------|------------------------------------------------------------------------------------------|---------------------------|----|--|
| 5_48 | In the <b>last 3 months</b> how many times has [name's] weight been measured by the AWW? | Not at all                | -8 |  |
|      |                                                                                          | At least once a month     | 1  |  |
|      |                                                                                          | At least once in 3 months | 2  |  |
|      |                                                                                          | Any other.....            | 3  |  |
|      |                                                                                          | Don't know                | -9 |  |
| 5_49 | After [name] was weighed from whom did you receive nutritional counselling?              | None                      | -8 |  |
|      |                                                                                          | Anganwadi worker          | 1  |  |
|      |                                                                                          | ASHA                      | 2  |  |
|      |                                                                                          | ANM                       | 3  |  |
|      |                                                                                          | Womens' group facilitator | 4  |  |
|      |                                                                                          | Group member              | 5  |  |
|      |                                                                                          | Others.....               | 6  |  |
| 5_50 | Was your child referred to MTC or NHRC ever?                                             | Yes                       | 1  |  |
|      |                                                                                          | No                        | 2  |  |
| 5_51 | How many times in total in the <b>last 3 months</b> has your child been ill/sick?        | None                      | -8 |  |
|      |                                                                                          | 1-2 times                 | 1  |  |
|      |                                                                                          | 3-4 times                 | 2  |  |
|      |                                                                                          | 5-6 times                 | 3  |  |
|      |                                                                                          | 7 or more times           | 4  |  |
|      |                                                                                          | Don't know/can't remember | -9 |  |

| Questions Related to Malaria |                                                                               |                                                    |    |      |
|------------------------------|-------------------------------------------------------------------------------|----------------------------------------------------|----|------|
| 5_52                         | Do you have a mosquito net in the house?                                      | Yes                                                | 1  |      |
|                              |                                                                               | No                                                 | 2  |      |
| 5_53                         | What kind of net did (name) sleep under last night?                           | Ordinary net                                       | 1  | 5_55 |
|                              |                                                                               | Insecticide treated bed nets(ITBN)                 | 2  | 5_55 |
|                              |                                                                               | Did not use a bed net                              | 3  |      |
| 5_54                         | Why did (name) not sleep under a bed net?                                     | Did not see a need to use a net                    | 1  |      |
|                              |                                                                               | Does not feel comfortable sleeping under a bed net | 2  |      |
|                              |                                                                               | Less or no mosquito bites in our locality          | 3  |      |
|                              |                                                                               | Baby was covered with cloth last night             | 4  |      |
|                              |                                                                               | Bed net damaged                                    | 5  |      |
|                              |                                                                               | Any other_____                                     | 6  |      |
| 5_55                         | In the last 3 months did the child [name] have a blood test for malaria?      | Yes                                                | 1  | 6_01 |
|                              |                                                                               | No                                                 | 2  |      |
|                              |                                                                               | Do not know                                        | -9 |      |
| 5_56                         | Was the baby [name] treated for malaria ( <b>not with herbal medicines</b> )? | Yes                                                | 1  |      |
|                              |                                                                               | No                                                 | 2  |      |
|                              |                                                                               | Do not know                                        | -9 |      |

**SECTION 6: ANTHROPOMETRY**

| No.   | Question                                                                                                             | Response                                                                                                                                                                                                                                 | Code                       |                      |                            |   |  |  |   |  |  |  |
|-------|----------------------------------------------------------------------------------------------------------------------|------------------------------------------------------------------------------------------------------------------------------------------------------------------------------------------------------------------------------------------|----------------------------|----------------------|----------------------------|---|--|--|---|--|--|--|
| 6_01  | Name of the child                                                                                                    |                                                                                                                                                                                                                                          |                            |                      |                            |   |  |  |   |  |  |  |
| 6_02  | Sex of the child<br>Male<br>Female                                                                                   | 1<br>2                                                                                                                                                                                                                                   |                            |                      |                            |   |  |  |   |  |  |  |
| 6_03  | Age of the child in months                                                                                           | -----in months<br><br>-----in years                                                                                                                                                                                                      |                            |                      |                            |   |  |  |   |  |  |  |
| 6_04a | Weight of the child: 1 <sup>st</sup> ___ ___ . ___ ___ Kg                                                            | <table border="1"> <thead> <tr> <th></th> <th>Weight of the mother</th> <th>Weight of mother and child</th> </tr> </thead> <tbody> <tr> <td>1</td> <td></td> <td></td> </tr> <tr> <td>2</td> <td></td> <td></td> </tr> </tbody> </table> |                            | Weight of the mother | Weight of mother and child | 1 |  |  | 2 |  |  |  |
|       | Weight of the mother                                                                                                 |                                                                                                                                                                                                                                          | Weight of mother and child |                      |                            |   |  |  |   |  |  |  |
| 1     |                                                                                                                      |                                                                                                                                                                                                                                          |                            |                      |                            |   |  |  |   |  |  |  |
| 2     |                                                                                                                      |                                                                                                                                                                                                                                          |                            |                      |                            |   |  |  |   |  |  |  |
| 6_04b | Weight of the child: 1 <sup>st</sup> ___ ___ . ___ ___ Kg                                                            |                                                                                                                                                                                                                                          |                            |                      |                            |   |  |  |   |  |  |  |
| 6_05a | <u>If child is under 2 years of age or is not able to stand:</u><br>Recumbent length of child (in cm to nearest 5mm) | ___ ___ ___ . ___ Cm                                                                                                                                                                                                                     |                            |                      |                            |   |  |  |   |  |  |  |
| 6_05b | Recumbent length of child (in cm to nearest 5mm)                                                                     | ___ ___ ___ . ___ Cm                                                                                                                                                                                                                     |                            |                      |                            |   |  |  |   |  |  |  |
| 6_06  | Height of child (in cm to nearest 5mm)                                                                               | ___ ___ ___ . ___ Cm                                                                                                                                                                                                                     |                            |                      |                            |   |  |  |   |  |  |  |
| 6_07a | Child MUAC measurement (in cm to nearest mm)                                                                         | ___ ___ . ___ Cm                                                                                                                                                                                                                         |                            |                      |                            |   |  |  |   |  |  |  |
| 6_07b | Child MUAC measurement (in cm to nearest mm)                                                                         | ___ ___ . ___ Cm                                                                                                                                                                                                                         |                            |                      |                            |   |  |  |   |  |  |  |
| 6_08  | Child MUAC colour category                                                                                           | Green <input type="checkbox"/><br><br>Yellow <input type="checkbox"/><br><br>Red <input type="checkbox"/>                                                                                                                                | 1<br><br>2<br><br>3        |                      |                            |   |  |  |   |  |  |  |
| 6_09  | Child with pitting oedema in BOTH feet?                                                                              | Yes<br>No                                                                                                                                                                                                                                | 1<br>2                     |                      |                            |   |  |  |   |  |  |  |

Thank you
