# Supplementary material for: Effects of participatory learning and action with women’s groups, counselling through home visits and crèches on undernutrition among children under three years in eastern India: a quasi-experimental study
Source: PubMed Central journal article supplement (PMC6637592; doi:10.1186/s12889-019-7274-3), 2019-07-18
Supplement: 12889_2019_7274_MOESM2_ESM.pdf [file 12889_2019_7274_MOESM2_ESM.pdf]

**Supplementary File 2:** Effects of interventions on children's weight-for-height, weight-for-age and height-for-age z scores

|                              | <b>Baseline</b> | <b>Endline</b> | <b>Absolute change in mean z score<br/>between baseline and endline</b> | <b>Adjusted coefficient (95% CI)<sup>1</sup></b> | <b>p</b> |
|------------------------------|-----------------|----------------|-------------------------------------------------------------------------|--------------------------------------------------|----------|
| <b>WHZ, mean (SD)</b>        |                 |                |                                                                         |                                                  |          |
| Control                      | -1.09 (1.33)    | -1.07 (1.64)   | -0.02                                                                   |                                                  |          |
| PLA and home visits          | -1.27 (1.35)    | -1.03 (1.50)   | -0.24                                                                   | 0.15 (-0.02-0.31)                                | 0.079    |
| Crèches, PLA and home visits | -1.11 (1.33)    | -1.12 (1.29)   | +0.01                                                                   | -0.08 (-0.24-0.09)                               | 0.328    |
| <b>WAZ, mean (SD)</b>        |                 |                |                                                                         |                                                  |          |
| Control                      | -2.07 (1.43)    | -2.06 (1.57)   | -0.01                                                                   |                                                  |          |
| PLA and home visits          | -2.09 (1.31)    | -1.95 (1.34)   | -0.14                                                                   | 0.14 (-0.01-0.30)                                | 0.082    |
| Crèches, PLA and home visits | -2.09 (1.40)    | -1.92 (1.27)   | -0.17                                                                   | 0.18 (0.02-0.33)                                 | 0.026    |
| <b>HAZ, mean (SD)</b>        |                 |                |                                                                         |                                                  |          |
| Control                      | -2.1 (1.78)     | -2.01 (1.96)   | +0.04                                                                   |                                                  |          |
| PLA and home visits          | -2.0 (1.73)     | -2.06 (1.69)   | -0.06                                                                   | -0.11 (-0.31-0.09)                               | 0.278    |
| Crèches, PLA and home visits | -2.26 (1.73)    | -1.96 (1.53)   | +0.30                                                                   | 0.25 (0.05-0.46)                                 | 0.014    |

<sup>1</sup> Adjusted for baseline differences in anthropometry, child age in months (continuous), tribal/caste status (categorical), ownership of MNREGA card (binary), any maternal education (binary), asset quintile (categorical), district (categorical, fixed effect) and clustering (random effect).
